# Supplementary material for: Inoculation with highly pathogenic avian influenza H5N1 genotype D1.1 in naïve dairy cows and dairy cows previously exposed to genotype B3.13
Source: Research Square preprint supplement (doi:10.21203/rs.3.rs-8339573/v1), 2025-12-30
Supplement: Supplementary file 1 [file 8e6cdc8cf5c74072607c60bf.xlsx]

## Sheet: all_sample_amino_acids
method	sample	Individual	DPI	locus	aa_position	nuc_position	reference	alternative	quality	depth	map_quality	allele_frequency	reference_codon	alternative_codon	reference_aa	alternative_aa	aa_changing
LoFreq	25-017621-003	2130	2	HA_H5	201	601	G	A	1946	11079	NA	0.022204	GAA	AAA	E	K	YES
LoFreq	25-017621-007	2130	4	HA_H5	201	601	G	A	9367	10677	NA	0.063314	GAA	AAA	E	K	YES
LoFreq	25-017621-007	2130	4	HA_H5	374	1120	G	A	180	10672	NA	0.005622	GAG	AAG	E	K	YES
LoFreq	25-017621-003	2130	2	HA_H5	543	1627	G	A	8949	9602	NA	0.066549	GCA	ACA	A	T	YES
LoFreq	25-017621-007	2130	4	HA_H5	543	1627	G	A	10574	11083	NA	0.069115	GCA	ACA	A	T	YES
LoFreq	25-017621-007	2130	4	MP	169	506	C	T	481	23700	NA	0.005316	ACC	ATC	T	I	YES
LoFreq	25-017621-003	2130	2	NA_N1	386	1157	G	A	383	11602	NA	0.008447	AGT	AAT	S	N	YES
LoFreq	25-017621-007	2130	4	NA_N1	386	1157	G	A	487	11564	NA	0.009512	AGT	AAT	S	N	YES
LoFreq	25-017621-003	2130	2	PB1	676	2027	A	G	336	6629	NA	0.013577	AAC	AGC	N	S	YES
LoFreq	25-017621-007	2130	4	PB1	676	2027	A	G	86	7333	NA	0.008455	AAC	AGC	N	S	YES
LoFreq	25-017621-003	2130	2	PB2	64	190	A	C	139	4894	NA	0.010421	ATG	CTG	M	L	YES
LoFreq	25-017621-003	2130	2	PB2	64	190	A	G	191	4894	NA	0.012056	ATG	GTG	M	V	YES
LoFreq	25-017621-017	2207	6	HA_H5	52	154	G	A	552	7420	NA	0.013208	GCA	ACA	A	T	YES
LoFreq	25-017621-013	2207	6	HA_H5	110	329	G	A	113	5031	NA	0.007951	AGC	AAC	S	N	YES
LoFreq	25-017621-004	2207	2	HA_H5	201	601	G	A	2342	12334	NA	0.023674	GAA	AAA	E	K	YES
LoFreq	25-017621-013	2207	6	HA_H5	201	601	G	A	11792	5723	NA	0.121615	GAA	AAA	E	K	YES
LoFreq	25-017621-017	2207	8	HA_H5	201	601	G	A	13439	10999	NA	0.081371	GAA	AAA	E	K	YES
LoFreq	25-017621-013	2207	6	HA_H5	351	1052	T	A	131	5578	NA	0.008964	ATA	AAA	I	K	YES
LoFreq	25-017621-004	2207	2	HA_H5	543	1627	G	A	10535	10990	NA	0.069154	GCA	ACA	A	T	YES
LoFreq	25-017621-013	2207	6	HA_H5	543	1627	G	A	7589	11703	NA	0.056054	GCA	ACA	A	T	YES
LoFreq	25-017621-017	2207	8	HA_H5	543	1627	G	A	1492	11263	NA	0.019267	GCA	ACA	A	T	YES
LoFreq	25-017621-004	2207	2	MP	169	506	C	T	583	23936	NA	0.006058	ACC	ATC	T	I	YES
LoFreq	25-017621-013	2207	6	MP	169	506	C	T	49314	24703	NA	0.20706	ACC	ATC	T	I	YES
LoFreq	25-017621-017	2207	8	MP	169	506	C	T	31797	19052	NA	0.093271	ACC	ATC	T	I	YES
LoFreq	25-017621-017	2207	8	MP	204	610	G	A	5806	17963	NA	0.028559	GAG	AAG	E	K	YES
LoFreq	25-017621-013	2207	6	MP	214	642	G	T	740	21924	NA	0.006614	CAG	CAT	Q	H	YES
LoFreq	25-017621-017	2207	8	NA_N1	142	425	A	G	1906	13463	NA	0.028003	GAT	GGT	D	G	YES
LoFreq	25-017621-004	2207	2	NA_N1	386	1157	G	A	218	12261	NA	0.006362	AGT	AAT	S	N	YES
LoFreq	25-017621-004	2207	2	NS	166	496	C	A	712	20321	NA	0.007332	CTT	ATT	L	I	YES
LoFreq	25-017621-013	2207	6	NS	166	496	C	A	702	21002	NA	0.007523	CTT	ATT	L	I	YES
LoFreq	25-017621-017	2207	8	PA	394	1180	G	A	3722	4198	NA	0.062649	GAT	AAT	D	N	YES
LoFreq	25-017621-004	2207	2	PB1	676	2027	A	G	77	6611	NA	0.007412	AAC	AGC	N	S	YES
LoFreq	25-017621-004	2207	2	PB2	64	190	A	G	122	5192	NA	0.012134	ATG	GTG	M	V	YES
LoFreq	25-017621-017	2207	8	PB2	365	1094	T	C	68	1757	NA	0.008537	ATG	ACG	M	T	YES
LoFreq	25-017621-004	2207	2	PB2	719	2155	G	A	148	9973	NA	0.005014	GGA	AGA	G	R	YES
LoFreq	25-017621-023	2207-alt-teat	7	MP	254	760	T	C	1832	19600	NA	0.015765	TCC	CCC	S	P	YES
LoFreq	25-017621-023	2207-alt-teat	7	PA	364	1090	A	T	258	8050	NA	0.009317	AGT	TGT	S	C	YES
